# Supplementary material for: N-Glycan Profiles of Neuraminidase from Avian Influenza Viruses
Source: MDPI journal article supplement (doi:10.3390/v16020190), 2024-01-26
Supplement: s1 [file s1]

| Lectin  | Specificity                                                                 | H5N1        | H5N1                      | H5N2                      | H5N2        | H7n2                  | H7N2                      | H9N2                  | H9N2        | H5N1   | H9N2   |
|---------|-----------------------------------------------------------------------------|-------------|---------------------------|---------------------------|-------------|-----------------------|---------------------------|-----------------------|-------------|--------|--------|
|         |                                                                             | CK          | DK                        | M                         | 0           | W                     | CK                        | CK                    | DK          | CK/H   | CK/H   |
|         |                                                                             |             |                           |                           |             |                       |                           |                       |             | 5N1D   | 9N2D   |
|         |                                                                             |             |                           |                           |             |                       |                           |                       |             | K      | K      |
| JACALIN | Gal $\beta$ 1-3GalNAc $\alpha$ -Ser/Thr(T),<br>GalNAc $\alpha$ -Ser/Thr(Tn) | 0.0074      | 0.0094<br>$\pm$ 0.008     | ND                        | 0.0103      | 0.0273                | 0.0137                    | 0.0014                | 0.0003      | 0.7174 | ND     |
|         |                                                                             | $\pm$       |                           |                           | $\pm$       | $\pm$                 | $\pm$                     | $\pm$                 | $\pm$       |        |        |
|         |                                                                             | 0.0066      |                           |                           | 0.0086      | 0.0031                | 0.002                     | 0.0024                | 0.0005      |        |        |
| ECA     | Gal $\beta$ -1,4GlcNAc                                                      | 0.0157      | 0.01 $\pm$<br>0.0008      | ND                        | 0.0045      | 0.088 $\pm$<br>0.0078 | 0.0018<br>$\pm$<br>0.0007 | 0.008 $\pm$<br>0.0139 | ND          | 1.5208 | ND     |
|         |                                                                             | $\pm$       |                           |                           | $\pm$       |                       |                           |                       |             |        |        |
|         |                                                                             | 0.0013      |                           |                           | 0.0031      |                       |                           |                       |             |        |        |
| HHL     | PolyMan, $(\alpha$ 1-3) and $(\alpha$ 1-6) Man                              | 0.007 $\pm$ | 0.0077<br>$\pm$ 0.001     | ND                        | 0.0005      | 0.0011                | ND                        | 0.0014                | ND          | 0.7156 | ND     |
|         |                                                                             | $\pm$       |                           |                           | $\pm$       | $\pm$                 |                           | $\pm$                 |             |        |        |
|         |                                                                             | 0.0047      |                           |                           | 0.0009      | 0.0016                |                           | 0.0024                |             |        |        |
| WFA     | GalNAc $\alpha$ / $\beta$ 1-3/6Gal                                          | 0.0232      | 0.0138<br>$\pm$ 0.001     | 0.0321<br>$\pm$ 0.014     | 0.024 $\pm$ | 0.0875                | 0.0511                    | 0.0248                | 0.0068      | 1.8993 | 3.2453 |
|         |                                                                             | $\pm$       |                           |                           | 0.0054      | $\pm$                 | $\pm$                     | $\pm$                 | $\pm$       |        |        |
|         |                                                                             | 0.0067      |                           |                           |             | 0.0134                | 0.0079                    | 0.0019                | 0.0018      |        |        |
| GSL-II  | $\alpha$ GalNAc, $\alpha$ Gal                                               | 0.0102      | 0.0087<br>$\pm$           | 0.0057<br>$\pm$           | 0.0242      | 0.0034                | ND                        | ND                    | ND          | 1.5163 | ND     |
|         |                                                                             | $\pm$       |                           |                           | $\pm$       | $\pm$                 |                           |                       |             |        |        |
|         |                                                                             | 0.0072      |                           |                           | 0.0123      | 0.0031                |                           |                       |             |        |        |
| MAL-II  | Sia2-3Gal $\beta$ 1-4Glc(NAc)                                               | 0.0047      | 0.0072<br>$\pm$           | ND                        | 0.0016      | 0.0003                | ND                        | ND                    | ND          | 0.6911 | ND     |
|         |                                                                             | $\pm$       |                           |                           | $\pm$       | $\pm$                 |                           |                       |             |        |        |
|         |                                                                             | 0.0035      |                           |                           | 0.0014      | 0.0003                |                           |                       |             |        |        |
| PHA-E   | Bisecting GlcNAc, biantennary<br>N-glycans                                  | 0.1133      | 0.0333<br>$\pm$           | 0.1262<br>$\pm$ 0.032     | 0.0675      | 0.0336                | 0.1162                    | 0.119 $\pm$           | 0.1078      | 5.0050 | 1.1281 |
|         |                                                                             | $\pm$       |                           |                           | $\pm$       | $\pm$                 | $\pm$                     | $\pm$                 | $\pm$       |        |        |
|         |                                                                             | 0.0069      |                           |                           | 0.0292      | 0.0105                | 0.0061                    | 0.0244                | 0.0157      |        |        |
| PTL-I   | $\alpha$ GalNAc                                                             | 0.0028      | 0.0088<br>$\pm$           | ND                        | 0.0083      | 0.0038                | 0.0055                    | ND                    | ND          | 0.4703 | ND     |
|         |                                                                             | $\pm$       |                           |                           | $\pm$       | $\pm$                 | $\pm$                     |                       |             |        |        |
|         |                                                                             | 0.0024      |                           |                           | 0.0072      | 0.0035                | 0.0024                    |                       |             |        |        |
| SJA     | Terminal GalNAc and Gal                                                     | 0.0064      | 0.0075<br>$\pm$           | ND                        | 0.0047      | 0.0305                | 0.001                     | ND                    | ND          | 1.1317 | ND     |
|         |                                                                             | $\pm$       |                           |                           | $\pm$       | $\pm$                 | $\pm$                     |                       |             |        |        |
|         |                                                                             | 0.0056      |                           |                           | $\pm$ 0.004 | 0.0122                | 0.0017                    |                       |             |        |        |
| PNA     | Gal $\beta$ 1-3GalNAc $\alpha$ -Ser/Thr(T)                                  | 0.0048      | 0.0069<br>$\pm$ 0.004     | ND                        | 0.0025      | 0.002 $\pm$           | 0.0009                    | 0.0019                | ND          | 0.7844 | ND     |
|         |                                                                             | $\pm$       |                           |                           | $\pm$       | 0.0017                | $\pm$                     | $\pm$                 |             |        |        |
|         |                                                                             | 0.0042      |                           |                           | 0.0019      |                       | 0.0016                    | 0.0033                |             |        |        |
| EEL     | Gal $\alpha$ 1-3(Fuca1-2)Gal                                                | 0.0099      | 0.0093<br>$\pm$           | ND                        | 0.0016      | 0.0015                | 0.001                     | 0.0015                | ND          | 1.0526 | ND     |
|         |                                                                             | $\pm$       |                           |                           | $\pm$       | $\pm$                 | $\pm$                     | $\pm$                 |             |        |        |
|         |                                                                             | 0.0053      |                           |                           | 0.0018      | 0.0019                | 0.0017                    | 0.0026                |             |        |        |
| AAL     | Fuca-1,6GlcNAc(core<br>fucose),Fuca-1,3Gal $\beta$ -1,4GlcNAc               | 0.088 $\pm$ | 0.1122<br>$\pm$<br>0.0349 | 0.0519<br>$\pm$<br>0.0096 | 0.0342      | 0.0154                | 0.2725                    | 0.0579                | 0.1909      | 0.7447 | 0.2668 |
|         |                                                                             | $\pm$       |                           |                           | $\pm$       | $\pm$                 | $\pm$                     | $\pm$                 | $\pm$       |        |        |
|         |                                                                             | 0.0183      |                           |                           | 0.0053      | 0.0014                | 0.0039                    | 0.0055                | 0.0544      |        |        |
| LTL     | Fuc $\alpha$ 1-3(Gal $\beta$ 1-4)GlcNAc,<br>anti-H blood group specificity  | 0.0118      | 0.0089<br>$\pm$           | 0.0037<br>$\pm$           | 0.0052      | 0.0062                | 0.0177                    | 0.006 $\pm$           | 0.003 $\pm$ | 1.6452 | ND     |
|         |                                                                             | $\pm$       |                           |                           | $\pm$       | $\pm$                 | $\pm$                     | $\pm$                 | $\pm$       |        |        |
|         |                                                                             | 0.0079      |                           |                           | 0.0064      | 0.0045                | 0.0002                    | 0.005                 | 0.0053      |        |        |
| MPL     | Gal $\beta$ 1-3GalNAc, GalNAc                                               | 0.0052      | 0.0032                    | ND                        | ND          | 0.0003                | ND                        | ND                    | ND          | 4.4357 | ND     |

|         |                                                                                                                   |             |             |         |             |        |        |         |         |        |        |
|---------|-------------------------------------------------------------------------------------------------------------------|-------------|-------------|---------|-------------|--------|--------|---------|---------|--------|--------|
|         |                                                                                                                   | ±<br>0.0024 | ±<br>0.0045 |         | ±<br>0.0005 |        |        |         |         |        |        |
| LEL     | (GlcNAc) <sub>n</sub> ,high mannose-type<br>N-glycans                                                             | 0.0025      | 0.0123      |         | 0.0028      | 0.0602 |        | 0.0018  |         |        |        |
|         |                                                                                                                   | ±           | ±           | ND      | ±           | ±      | ND     | ±       | ND      | 0.2944 | ND     |
|         |                                                                                                                   | 0.0022      | 0.0003      |         | 0.0022      | 0.0044 |        | 0.0031  |         |        |        |
| GSL-I   | GlcNAc                                                                                                            | 0.0038      |             |         | 0.0045      | 0.0037 |        |         |         |        |        |
|         |                                                                                                                   | ± 0.004     | ND          | ND      | ±           | ±      | ND     | ND      | ND      | ND     | ND     |
|         |                                                                                                                   |             |             |         | 0.0066      | 0.0011 |        |         |         |        |        |
| DBA     | $\alpha$ GalNAc,Tn antigen, GalNAc<br>$\alpha$ 1-3((Fuc $\alpha$ 1-2))Gal                                         | 0.0045      | 0.0077      | 0.0078  | 0.0205      | 0.0285 | 0.0158 | 0.0008  |         |        |        |
|         |                                                                                                                   | ±           | ±           | ±       | ±           | ±      | ±      | ±       | ND      | 0.7512 | ND     |
|         |                                                                                                                   | 0.0041      | 0.0048      | 0.0036  | 0.0124      | 0.0034 | 0.003  | 0.0014  |         |        |        |
| LCA     | $\alpha$ Man,Fuc $\alpha$ 1-6GlcNAc(core<br>fucose)                                                               | 0.0492      | 0.0226      | 0.0151  | 0.0117      | 0.0471 | 0.0744 | 0.0191  | 0.0062  |        |        |
|         |                                                                                                                   | ±           | ±           | ±       | ±           | ±      | ±      | ±       | ±       | 1.9744 | 2.2440 |
|         |                                                                                                                   | 0.0057      | 0.0069      | 0.0013  | 0.0031      | 0.0061 | 0.008  | 0.0045  | 0.0044  |        |        |
| RCA-120 | $\beta$ Gal, Gal $\beta$ -1, 4GlcNAc (type II),<br>Gal $\beta$ 1-3GlcNAc (type I )                                | 0.0443      | 0.1005      | 0.1617  | 0.1913      | 0.0024 | 0.1116 |         | 0.1026  |        |        |
|         |                                                                                                                   | ±           | ±           | ±       | ±           | ±      | ±      | 0.1422  | ±       | 0.4795 | 1.3436 |
|         |                                                                                                                   | 0.0051      | 0.0241      | 0.0445  | 0.0532      | 0.0027 | 0.0022 | ± 0.031 | 0.0089  |        |        |
| STL     | trimers and tetramers of GlcNAc,<br>core (GlcNAc) of N-glycan,<br>oligosaccharide containing<br>GlcNAc and MurNAc | 0.0066      |             |         | 0.0086      | 0.0458 | 0.0003 | 0.0051  | 0.0023  |        |        |
|         |                                                                                                                   | ±           | ND          | 0.01 ±  | ±           | ±      | ±      | ±       | ±       | ND     | 1.7649 |
|         |                                                                                                                   | 0.0058      |             | 0.0057  | 0.0087      | 0.0033 | 0.0005 | 0.0032  | 0.0012  |        |        |
| BS-I    | $\alpha$ Gal and $\alpha$ GalNAc                                                                                  | 0.0077      | 0.0095      |         | 0.0073      | 0.0043 | 0.0128 |         |         |        |        |
|         |                                                                                                                   | ±           | ±           | ND      | ±           | ±      | ±      | ND      | ND      | 0.7569 | ND     |
|         |                                                                                                                   | 0.0014      | 0.0051      |         | 0.0065      | 0.0021 | 0.0046 |         |         |        |        |
| CONA    | High-Mannose, Man $\alpha$ 1-6(Man<br>$\alpha$ 1-3)Man, terminal GlcNAc                                           | 0.0427      | 0.0236      | 0.0565  | 0.0125      | 0.0065 | 0.0371 | 0.2309  |         |        |        |
|         |                                                                                                                   | ±           | ±           | ±       | ±           | ±      | ±      | ±       | ND      | 1.6523 | ND     |
|         |                                                                                                                   | 0.0071      | 0.0069      | 0.0079  | 0.0016      | 0.0083 | 0.0046 | 0.0268  |         |        |        |
| PTL-II  | Gal                                                                                                               | 0.0049      |             |         | 0.0084      | 0.0088 | 0.0049 |         |         |        |        |
|         |                                                                                                                   | ±           | 0.015 ±     | ND      | ±           | ±      | ±      | 0.0023  | ND      | 0.2744 | ND     |
|         |                                                                                                                   | 0.0052      | 0.0027      |         | 0.0074      | 0.0014 | 0.0039 | ± 0.004 |         |        |        |
| DSA     | B-D-GlcNAc, (GlcNAc $\beta$ 1-4) <sub>n</sub> ,<br>Gal $\beta$ 1-4GlcNAc                                          | 0.2783      | 0.2833      | 0.2226  | 0.2824      | 0.2873 | 0.073  | 0.0956  | 0.2868  |        |        |
|         |                                                                                                                   | ± 0.014     | ±           | ±       | ± 0.081     | ±      | ±      | ±       | ±       | 0.9543 | 0.2994 |
|         |                                                                                                                   |             | 0.0184      | 0.0364  |             | 0.0129 | 0.0093 | 0.0192  | 0.0177  |        |        |
| SBA     | Terminal GalNAc                                                                                                   | 0.0408      | 0.0618      | 0.0605  |             | 0.0199 | 0.0171 |         |         |        |        |
|         |                                                                                                                   | ±           | ±           | ±       | 0.1308      | ±      | ±      | 0.02 ±  | 0.065 ± | 0.6102 | 0.2334 |
|         |                                                                                                                   | 0.0068      | 0.0102      | 0.0099  | ± 0.043     | 0.0089 | 0.003  | 0.0087  | 0.0077  |        |        |
| VVA     | Terminal GalNAc and<br>GalNAc $\alpha$ -Ser/Thr(Tn)                                                               | 0.0099      | 0.0077      |         | 0.0005      | 0.0318 |        | 0.0054  |         |        |        |
|         |                                                                                                                   | ±           | ±           | ND      | ±           | ±      | ND     | ±       | ND      | 1.1359 | ND     |
|         |                                                                                                                   | 0.0047      | 0.0017      |         | 0.0009      | 0.0429 |        | 0.0094  |         |        |        |
| NPA     | High-Mannose, $\alpha$ 1-6Man                                                                                     | 0.0028      |             |         |             | 0.0022 |        |         |         |        |        |
|         |                                                                                                                   | ±           | 0.0084      | ND      | 0.0043      | ±      | ND     | ND      | ND      | 0.3282 | ND     |
|         |                                                                                                                   | 0.0026      | ± 0.005     |         | ± 0.004     |        |        | 0.0008  |         |        |        |
| PSA     | Fucose $\alpha$ 1-6GlcNAc(core fucose)                                                                            | 0.0385      | 0.0486      | 0.044 ± | 0.0199      |        | 0.0455 | 0.0513  | 0.0043  |        |        |
|         |                                                                                                                   | ± 0.001     | ±           | 0.0159  | ±           | ND     | ±      | ±       | ±       | 0.7886 | ND     |

|         |                                                   |                       |                 |             |                 |                       |                 |                       |        |        |        |
|---------|---------------------------------------------------|-----------------------|-----------------|-------------|-----------------|-----------------------|-----------------|-----------------------|--------|--------|--------|
|         |                                                   |                       | 0.0135          |             | 0.0034          |                       | 0.0059          | 0.0156                | 0.0074 |        |        |
|         |                                                   | 0.0403                | 0.0281          | 0.1319      | 0.0359          |                       | 0.0219          | 0.1294                | 0.1327 |        |        |
| ACA     | Gal $\beta$ 1-3GalNAc $\alpha$ -Ser/Thr(T)        | $\pm$                 | $\pm$           | $\pm$       | $\pm$           | 0.007 $\pm$<br>0.0024 | $\pm$           | $\pm$                 | $\pm$  | 1.4686 | 0.9775 |
|         |                                                   | 0.0054                | 0.0035          | 0.0509      | 0.0043          |                       | 0.0066          | 0.0297                | 0.0209 |        |        |
|         |                                                   | 0.0241                | 0.0162          | 0.0145      | 0.0101          | 0.0381                | 0.0214          |                       | 0.0404 |        |        |
| WGA     | Terminal GlcNAc, (GlcNAc)n                        | $\pm$                 | $\pm$           | $\pm$       | $\pm$           | $\pm$                 | $\pm$           | 0.0224<br>$\pm$ 0.01  | $\pm$  | 1.2821 | 0.4899 |
|         |                                                   | 0.0021                | 0.0034          | 0.0077      | 0.0029          | 0.0041                | 0.0048          |                       | 0.0028 |        |        |
|         |                                                   | 0.003 $\pm$<br>0.0026 | 0.0091<br>$\pm$ | ND          | 0.0084<br>$\pm$ | 0.0059<br>$\pm$       | 0.0207<br>$\pm$ | ND                    | ND     | 0.4327 | ND     |
|         |                                                   |                       | 0.0019          |             | 0.0073          | 0.0027                | 0.0058          |                       |        |        |        |
|         |                                                   | 0.0092                | 0.0089          |             | 0.0063          |                       | 0.0029          |                       |        |        |        |
| PWM     | GlcNAc,Branched (LacNAc)n                         | $\pm$                 | $\pm$           | ND          | $\pm$           | 0.002 $\pm$<br>0.0018 | $\pm$           | ND                    | ND     | 0.9807 | ND     |
|         |                                                   | 0.0066                | 0.0021          |             | 0.0041          |                       | 0.0032          |                       |        |        |        |
|         |                                                   | 0.0109                | 0.0053          |             | 0.0001          | 0.0256                |                 |                       |        |        |        |
| MAL-I   | Gal $\beta$ -1,4GlcNAc                            | $\pm$                 | $\pm$           | ND          | $\pm$           | $\pm$                 | ND              | ND                    | ND     | 5.4379 | ND     |
|         |                                                   | 0.0049                | 0.0072          |             | 0.0002          | 0.0049                |                 |                       |        |        |        |
|         |                                                   | 0.0067                | 0.0129          |             | 0.0058          | 0.0162                | 0.0044          | 0.0028                |        |        |        |
| GNA     | Terminal $\alpha$ 1-3Man                          | $\pm$                 | $\pm$           | ND          | $\pm$           | $\pm$                 | $\pm$           | $\pm$                 | ND     | 0.6147 | ND     |
|         |                                                   | 0.0029                | 0.0019          |             | 0.0022          | 0.0024                | 0.0021          | 0.0049                |        |        |        |
|         |                                                   | 0.0072                | 0.0112          | 0.0116      | 0.0192          | 0.0261                | 0.0072          | 0.0149                | 0.0016 |        |        |
| BPL     | Gal $\beta$ 1-3GalNAc,Terminal<br>GalNAc          | $\pm$                 | $\pm$           | $\pm$       | $\pm$           | $\pm$                 | $\pm$           | $\pm$                 | $\pm$  | 0.7054 | ND     |
|         |                                                   | 0.0045                | 0.0032          | 0.0051      | 0.0179          | 0.0101                | 0.0042          | 0.0021                | 0.0027 |        |        |
|         |                                                   | 0.046 $\pm$           | 0.0479          | 0.044 $\pm$ | 0.0159          | 0.0143                | 0.0343          | 0.0321                | 0.0492 |        |        |
| PHA-E+L | Tri- and tetra-antennary<br>complex-type N-glycan | 0.0076                | $\pm$ 0.011     | 0.0071      | $\pm$           | $\pm$                 | $\pm$           | $\pm$                 | $\pm$  | 0.9447 | 0.5690 |
|         |                                                   |                       |                 |             | 0.0027          | 0.0056                | 0.0109          | 0.0101                | 0.0085 |        |        |
|         |                                                   | 0.0056                | 0.0127          |             | 0.0037          | 0.0153                | 0.0133          |                       |        |        |        |
| SNA     | Sia2-6Gal $\beta$ 1-4Glc(NAc)                     | $\pm$                 | $\pm$           | ND          | $\pm$           | $\pm$                 | $\pm$           | 0.0019<br>$\pm$ 0.003 | ND     | 0.2600 | ND     |
|         |                                                   | 0.0044                | 0.0049          |             | 0.0036          | 0.0043                | 0.0013          |                       |        |        |        |
