# Supplementary material for: N-Glycan Profiles of Neuraminidase from Avian Influenza Viruses
Source: MDPI journal article supplement (doi:10.3390/v16020190), 2024-01-26
Supplement: s1 [file s1]

| No. | Calculated<br><i>m/z</i> | Ion<br>type     | Proposed <i>N</i> -<br>glycan structure                                             | Relative intensities of <i>N</i> -glycans * |        |        |        |        |        |        |        |
|-----|--------------------------|-----------------|-------------------------------------------------------------------------------------|---------------------------------------------|--------|--------|--------|--------|--------|--------|--------|
|     |                          |                 |                                                                                     | H5N1CK                                      | H5N1DK | H5N2MD | H5N2OT | H7N1FL | H7N2CK | H9N2CK | H9N2DK |
| 1   | 1257.4226                | Na <sup>+</sup> |    | 0.0475                                      | 0.0688 | 0.0523 | 0.0509 | 0.0425 | 0.0819 | 0.0777 | 0.0528 |
| 2   | 1419.4754                | Na <sup>+</sup> |    | 0.0530                                      | 0.1113 | 0.1148 | 0.1382 | 0.0291 | 0.0718 | 0.1575 | 0.0622 |
| 3   | 1460.5020                | Na <sup>+</sup> |    | 0.0161                                      | 0.0267 | 0.0247 | 0.0203 | 0.0247 | 0.0228 | 0.0204 | 0.0188 |
| 4   | 1501.5285                | Na <sup>+</sup> |    | 0.0159                                      | 0.0294 | 0.0194 | 0.0132 | 0.0261 | 0.0221 | 0.0107 | 0.0215 |
| 5   | 1542.5551                | Na <sup>+</sup> |    | 0.0154                                      | 0.0294 | 0.0168 | 0.0122 | ND     | 0.0146 | 0.0107 | 0.0146 |
| 6   | 1581.5282                | Na <sup>+</sup> |    | 0.0095                                      | 0.0334 | 0.0155 | 0.0205 | 0.0196 | 0.0150 | 0.0212 | 0.0232 |
| 7   | 1622.5548                | Na <sup>+</sup> |    | 0.0290                                      | 0.0311 | 0.0266 | 0.0349 | 0.0335 | 0.0235 | 0.0340 | 0.0252 |
| 8   | 1663.5813                | Na <sup>+</sup> |    | 0.2218                                      | 0.2084 | 0.1961 | 0.2181 | 0.1791 | 0.2442 | 0.2264 | 0.1985 |
| 9   | 1704.6079                | Na <sup>+</sup> |  | 0.0452                                      | 0.0437 | 0.0544 | 0.0329 | 0.0352 | 0.0493 | 0.0321 | 0.0415 |
| 10  | 1745.6344                | Na <sup>+</sup> |  | 0.0525                                      | 0.0634 | 0.0758 | 0.0433 | 0.0228 | 0.0399 | 0.0386 | 0.0430 |
| 11  | 1809.6393                | Na <sup>+</sup> |  | 0.0650                                      | 0.0399 | 0.0277 | 0.0187 | 0.2106 | 0.0212 | 0.0135 | 0.0716 |
| 12  | 1825.6342                | Na <sup>+</sup> |  | 0.0265                                      | 0.0169 | 0.0182 | 0.0172 | 0.0336 | 0.0152 | 0.0135 | 0.0220 |
| 13  | 1850.6658                | Na <sup>+</sup> |  | 0.0288                                      | 0.0000 | 0.0115 | 0.0082 | 0.0519 | 0.0108 | 0.0000 | 0.0223 |
| 14  | 1866.6607                | Na <sup>+</sup> |  | 0.1367                                      | 0.1175 | 0.1389 | 0.1497 | 0.0682 | 0.1736 | 0.1499 | 0.1400 |
| 15  | 1883.6519                | H <sup>+</sup>  |  | ND                                          | ND     | 0.0208 | 0.0152 | 0.0147 | 0.0185 | 0.0072 | 0.0203 |
| 16  | 1907.6873                | Na <sup>+</sup> |  | 0.0532                                      | 0.0541 | 0.0241 | 0.0479 | 0.0195 | 0.0385 | 0.0410 | 0.0483 |

|    |           |                 |                                                                                   |        |        |        |        |        |        |        |        |
|----|-----------|-----------------|-----------------------------------------------------------------------------------|--------|--------|--------|--------|--------|--------|--------|--------|
| 17 | 1948.7138 | Na <sup>+</sup> |  | 0.0095 | 0.0145 | 0.0155 | 0.0101 | ND     | 0.0126 | 0.0091 | 0.0136 |
| 18 | 2028.7135 | Na <sup>+</sup> |  | 0.0992 | 0.0736 | 0.1037 | 0.1174 | 0.0765 | 0.0973 | 0.1108 | 0.1004 |
| 19 | 2151.7932 | Na <sup>+</sup> |  | 0.0251 | 0.0221 | 0.0216 | 0.0131 | ND     | 0.0170 | 0.0152 | 0.0214 |
| 20 | 2174.7714 | Na <sup>+</sup> |  | 0.0283 | 0.0000 | 0.0081 | 0.0069 | 0.0739 | 0.0000 | 0.0000 | 0.0226 |
| 21 | 2313.8460 | Na <sup>+</sup> |  | 0.0217 | 0.0157 | 0.0136 | 0.0111 | ND     | 0.0103 | 0.0105 | 0.0162 |
| 22 | 2394.1760 | Na <sup>+</sup> |  | ND     | ND     | ND     | ND     | 0.0175 | ND     | ND     | ND     |
| 24 | 2540.2440 | Na <sup>+</sup> |  | ND     | ND     | ND     | ND     | 0.0210 | ND     | ND     | ND     |

\* H5N1DK: A/Duck/Guangdong/17/2008(H5N1), H5N1CK: A/Chicken/Guangxi/4/2009(H5N1), H5N2MD: A/Mallard/Jiangxi/16/2005(H5N2), H5N2OT: A/Ostrich/Denmark/96-72420/1996(H5N2), H7N1FL: A/Fowl/Rostock/45/1934(H7N1), H7N2CK: A/Chicken/Hebei/1/2002(H7N2), H9N2CK: A/Chicken/Fujian/S-1-521/2008(H9N1) and H9N2DK: A/Duck/Guangdong/S-7-134/2004(H9N2).
